# Supplementary material for: Transcription Factor ERF194 Modulates the Stress-Related Physiology to Enhance Drought Tolerance of Poplar
Source: MDPI journal article supplement (doi:10.3390/ijms24010788), 2023-01-02
Supplement: s1 [file s1]

**Table S1.** Detection of cis-acting elements in the promoters of genes using PlantCRAE.

| Cis-elements in Promoter Regions |                                                                   |                  |                  |                  |                  |                  |                  |                         |                         |                         |        |
|----------------------------------|-------------------------------------------------------------------|------------------|------------------|------------------|------------------|------------------|------------------|-------------------------|-------------------------|-------------------------|--------|
| Element                          |                                                                   | Promoter         |                  |                  |                  |                  |                  |                         |                         |                         |        |
| Common Name                      | Function Annotation                                               | Potri.001G070900 | Potri.001G084000 | Potri.002G013200 | Potri.008G065600 | Potri.018G063300 | Potri.005G195600 | POD2 (Potri.016G132700) | POD3 (Potri.007G053400) | SOD2 (Potri.009G005100) | ERF194 |
| TGAC G-motif                     | cis-acting regulatory element involved in the MeJA-responsiveness |                  | 2                | 2                | 2                | 1                | 1                |                         | 1                       |                         | 3      |
| TCA-element                      | cis-acting element involved in salicylic acid responsiveness      |                  | 2                |                  |                  |                  |                  | 1                       |                         |                         | 3      |
| TC-rich repeats                  | cis-acting element involved in defense and stress responsiveness  | 2                | 1                |                  |                  |                  | 1                | 2                       |                         |                         | 1      |
| MRE                              | MYB binding site involved in light responsiveness                 |                  |                  | 2                |                  | 1                | 1                |                         |                         | 3                       | 1      |
| G-box                            | cis-acting regulatory element involved in light responsiveness    |                  | 1                | 6                | 2                |                  | 3                |                         | 6                       |                         | 6      |
| CGTC A-motif                     | cis-acting regulatory element involved in the MeJA-responsiveness |                  | 2                | 2                | 2                | 1                | 1                |                         | 1                       |                         | 3      |
| Sp1                              | light responsive element                                          |                  |                  | 1                |                  |                  |                  |                         |                         |                         | 1      |
| AE-box                           | part of a module for light response                               |                  |                  |                  |                  | 1                |                  |                         | 1                       |                         | 2      |
| GC-motif                         | enhancer-like element involved in anoxic specific inducibility    |                  |                  |                  | 1                |                  |                  |                         |                         | 1                       | 1      |
| MBS                              | MYB binding site involved in drought-inducibility                 |                  |                  |                  | 1                | 1                | 1                |                         | 2                       |                         | 1      |

|                    |                                                                      |   |   |   |   |   |    |   |   |   |   |
|--------------------|----------------------------------------------------------------------|---|---|---|---|---|----|---|---|---|---|
| 3-AF1 binding site | light responsive element                                             |   |   |   |   |   |    |   |   |   | 1 |
| O2-site            | cis-acting regulatory element involved in zein metabolism regulation |   |   |   | 2 |   |    |   |   |   | 3 |
| CAT-box            | cis-acting regulatory element related to meristem expression         |   |   |   |   |   |    |   | 1 |   | 1 |
| ABRE               | cis-acting element involved in the abscisic acid responsiveness      | 1 | 3 | 5 | 2 |   | 3  |   | 8 |   | 7 |
| G-Box              | cis-acting regulatory element involved in light responsiveness       | 1 | 1 | 1 |   |   | 1  |   | 2 |   | 4 |
| Box 4              | part of a conserved DNA module involved in light responsiveness      | 5 | 6 | 6 | 4 | 7 | 10 | 6 | 6 | 5 | 9 |
| Box II             | part of a light responsive element                                   |   |   |   | 1 |   | 2  |   |   |   | 1 |
| ARE                | cis-acting regulatory element essential for the anaerobic induction  | 2 | 1 | 1 | 2 | 3 |    |   | 2 | 2 | 3 |
| GATA-motif         | part of a light responsive element                                   | 1 |   |   |   |   | 1  | 1 | 1 |   |   |
| AT1-motif          | part of a light responsive module                                    | 1 | 1 | 1 |   | 2 | 2  |   |   | 1 |   |
| LTR                | cis-acting element involved in low-temperature responsiveness        | 1 | 4 |   |   |   |    |   | 1 |   |   |
| TGA-element        | auxin-responsive element                                             | 1 |   |   | 2 |   |    |   |   |   |   |
| GT1-motif          | light responsive element                                             | 3 | 1 | 2 |   | 5 | 1  | 1 |   | 2 |   |
| TCT-motif          | part of a light responsive element                                   | 3 | 1 | 1 | 4 |   | 1  |   |   | 1 |   |

|                  |                                                                 |   |   |   |   |   |   |   |   |   |  |
|------------------|-----------------------------------------------------------------|---|---|---|---|---|---|---|---|---|--|
| ATCT-motif       | part of a conserved DNA module involved in light responsiveness | 1 |   | 1 |   |   | 1 |   | 1 |   |  |
| P-box            | gibberellin-responsive element                                  |   | 3 |   |   |   |   |   | 1 |   |  |
| circadian        | cis-acting regulatory element involved in circadian control     |   | 1 | 1 | 2 |   |   | 1 | 1 |   |  |
| chs-CMA2a        | part of a light responsive element                              |   | 1 |   |   |   |   |   |   |   |  |
| CCAAT-box        | MYBHv1 binding site                                             |   |   | 1 |   |   | 2 |   |   |   |  |
| A-box            | cis-acting regulatory element                                   |   |   | 1 | 2 |   |   |   |   |   |  |
| LS7              | part of a light responsive element                              |   |   | 1 |   |   |   |   |   |   |  |
| TATC-box         | cis-acting element involved in gibberellin-responsiveness       |   |   |   |   |   | 1 | 1 | 1 |   |  |
| AT-rich element  | binding site of AT-rich DNA binding protein (ATBP-1)            |   |   |   |   |   | 1 |   |   | 1 |  |
| GCN4_motif       | cis-regulatory element involved in endosperm expression         |   |   |   |   |   |   | 1 | 1 |   |  |
| LAMP-element     | part of a light responsive element                              |   |   |   | 1 |   |   |   |   |   |  |
| TCCC-motif       | part of a light responsive element                              |   |   |   | 1 | 1 |   |   |   |   |  |
| I-box            | part of a light responsive element                              |   |   |   |   |   |   |   |   | 1 |  |
| AT-rich sequence | element for maximal elicitor-mediated activation (2copies)      |   |   |   |   |   |   | 1 |   |   |  |
| GARE-motif       | gibberellin-responsive element                                  |   |   |   |   |   |   | 2 |   |   |  |

|               |                                                                         |  |  |  |  |   |  |  |  |  |  |
|---------------|-------------------------------------------------------------------------|--|--|--|--|---|--|--|--|--|--|
| ACA-m<br>otif | part of gapA in<br>(gapA-CMA1)<br>involved with light<br>responsiveness |  |  |  |  | 1 |  |  |  |  |  |
| ACE           | cis-acting element<br>involved in light<br>responsiveness               |  |  |  |  | 1 |  |  |  |  |  |

Note:The cis-acting element *ERF194* could bind to were marked in RED
